# Supplementary material for: Support of multiple sinks via a virtual root for the RPL routing protocol
Source: Springer Nature journal article supplement (doi:10.1186/1687-1499-2014-91), 2014-06-05

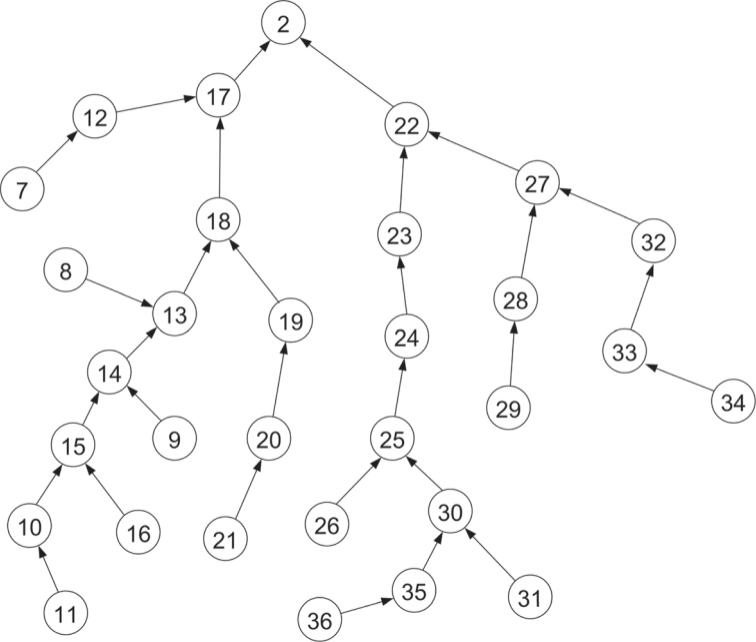

Supplement: 13638_2013_1048_MOESM14_ESM.pdf [file 13638_2013_1048_MOESM14_ESM.pdf]
